# Supplementary material for: Brain Plasticity Modulator p75 Neurotrophin Receptor in Human Urine after Different Acute Brain Injuries—A Prospective Cohort Study
Source: MDPI journal article supplement (doi:10.3390/biomedicines12010112), 2024-01-05
Supplement: s1 [file s1]

**Supplemental Table S2. Characteristics of combined cohort.**

| <b>Variables</b>                   | <b>Statistics (n=46)</b> |
|------------------------------------|--------------------------|
| <b>Age in years</b>                |                          |
| Mean±SD                            | 57.8±13.3                |
| Min–Max                            | 23.0–75.0                |
| Median (IQR)                       | 62.0 (47.0–70.0)         |
| <b>Sex</b>                         |                          |
| Male                               | 26 (56.5)                |
| Female                             | 20 (43.5)                |
| <b>Type of brain injury</b>        |                          |
| Aneurysmal subarachnoid hemorrhage | 22 (47.8)                |
| Traumatic brain injury             | 8 (17.4)                 |
| Ischemic stroke                    | 16 (34.8)                |
| <b>mRS</b>                         |                          |
| Favorable (mRS=0-3)                | 30 (65.2)                |
| Unfavorable (mRS=4-6)              | 16 (34.8)                |
