# Supplementary material for: Brain Plasticity Modulator p75 Neurotrophin Receptor in Human Urine after Different Acute Brain Injuries—A Prospective Cohort Study
Source: MDPI journal article supplement (doi:10.3390/biomedicines12010112), 2024-01-05
Supplement: s1 [file s1]

**Supplemental Table S1. Demographic and disease characteristics of the studied cohort.**

| <b>Aneurysmal subarachnoid hemorrhage</b> |                                  |                                   |                |
|-------------------------------------------|----------------------------------|-----------------------------------|----------------|
|                                           | <b>Favorable (mRS 0-3, n=13)</b> | <b>Unfavorable (mRS 4-6, n=9)</b> | <b>p-value</b> |
| <b>Age in years</b>                       |                                  |                                   | 0.5968         |
| Mean±SD                                   | 55.8±12.5                        | 58.9±14.6                         |                |
| Min–Max                                   | 38.0–75.0                        | 34.0–74.0                         |                |
| Median (IQR)                              | 59.0 (43.0–65.0)                 | 65.0 (47.0–70.0)                  |                |
| <b>Sex</b>                                |                                  |                                   | 0.5476         |
| Male                                      | 6 (46.2)                         | 3 (33.3)                          |                |
| Female                                    | 7 (53.8)                         | 6 (66.7)                          |                |
| <b>GCS scene</b>                          |                                  |                                   | 0.1200         |
| Mean±SD                                   | 12.8±3.7                         | 9.7±5.5                           |                |
| Min–Max                                   | 5.0–15.0                         | 3.0–15.0                          |                |
| Median (IQR)                              | 15.0 (13.0–15.0)                 | 12.0 (4.0–15.0)                   |                |
| <b>Neuroworsening</b>                     |                                  |                                   | 0.0180         |
| No                                        | 8 (61.5)                         | 1 (11.1)                          |                |
| Yes                                       | 5 (38.5)                         | 8 (88.9)                          |                |
| <b>Modified Fisher Scale</b>              |                                  |                                   | 0.3325         |
| Mean±SD                                   | 3.5±0.8                          | 3.8±0.7                           |                |
| Min–Max                                   | 2.0–4.0                          | 2.0–4.0                           |                |
| Median (IQR)                              | 4.0 (3.0–4.0)                    | 4.0 (4.0–4.0)                     |                |
| <b>H&amp;H</b>                            |                                  |                                   | 0.0205         |
| Mean±SD                                   | 2.3±1.4                          | 3.8±1.3                           |                |
| Min–Max                                   | 1.0–5.0                          | 2.0–5.0                           |                |
| Median (IQR)                              | 2.0 (1.0–3.0)                    | 4.0 (3.0–5.0)                     |                |
| <b>Location of Aneurysm</b>               |                                  |                                   | 0.2507         |
| ACA                                       | 1 (7.7)                          |                                   |                |
| AcomA                                     | 5 (38.5)                         | 3 (33.3)                          |                |
| MCA                                       | 1 (7.7)                          | 3 (33.3)                          |                |
| BAS                                       | 1 (7.7)                          |                                   |                |
| PcomA                                     |                                  | 2 (22.2)                          |                |
| PICA                                      | 1 (7.7)                          |                                   |                |
| ICA                                       | 4 (30.8)                         | 1 (11.1)                          |                |
| <b>Diagnosis of Acute Hydrocephalus</b>   |                                  |                                   | 0.5121         |
| No                                        | 9 (69.2)                         | 5 (55.6)                          |                |
| Yes                                       | 4 (30.8)                         | 4 (44.4)                          |                |
| <b>Clinical DCI</b>                       |                                  |                                   | 0.1324         |
| No                                        | 11 (84.6)                        | 5 (55.6)                          |                |
| Yes                                       | 2 (15.4)                         | 4 (44.4)                          |                |

| <b>Ischemic stroke</b>           |                                  |                                   |                |
|----------------------------------|----------------------------------|-----------------------------------|----------------|
|                                  | <b>Favorable (mRS 0-3, n=14)</b> | <b>Unfavorable (mRS 4-6, n=2)</b> | <b>p-value</b> |
| <b>Age in years</b>              |                                  |                                   | 0.5703         |
| Mean±SD                          | 60.4±11.4                        | 55.0±21.2                         |                |
| Min–Max                          | 37.0–74.0                        | 40.0–70.0                         |                |
| Median (IQR)                     | 64.0 (51.0–71.0)                 | 55.0 (40.0–70.0)                  |                |
| <b>Sex</b>                       |                                  |                                   | 0.2416         |
| Male                             | 8 (57.1)                         | 2 (100)                           |                |
| Female                           | 6 (42.9)                         |                                   |                |
| <b>Neuroworsening</b>            |                                  |                                   | 0.4677         |
| No                               | 11 (78.6)                        | 2 (100)                           |                |
| Yes                              | 3 (21.4)                         |                                   |                |
| <b>Type of infarction</b>        |                                  |                                   | 0.2301         |
| Cardiogenic                      | 4 (28.6)                         |                                   |                |
| Thrombosis                       | 5 (35.7)                         |                                   |                |
| Cryptic                          | 5 (35.7)                         | 2 (100)                           |                |
| <b>Volume of infarction (ml)</b> |                                  |                                   | 0.5488         |
| Mean±SD                          | 10.3±16.0                        | 58.5±79.6                         |                |
| Min–Max                          | 0.0–46.8                         | 2.2–114.8                         |                |
| Median (IQR)                     | 3.7 (0.4–6.4)                    | 58.5 (2.2–114.8)                  |                |

### **Traumatic brain injury**

|                               | <b>Favorable (mRS 0-3, n=3)</b> | <b>Unfavorable (mRS 4-6, n=5)</b> | <b>p-value</b> |
|-------------------------------|---------------------------------|-----------------------------------|----------------|
| <b>Age in years</b>           |                                 |                                   | 0.4295         |
| Mean±SD                       | 68.0±24.3                       | 60.0±12.3                         |                |
| Min–Max                       | 23.0–71.0                       | 42.0–71.0                         |                |
| Median (IQR)                  | 54.0 (23.0–71.0)                | 65.0 (47.5–70.0)                  |                |
| <b>Sex</b>                    |                                 |                                   | 0.4816         |
| Male                          | 3 (100)                         | 4 (80)                            |                |
| Female                        | 0 (0)                           | 1 (20)                            |                |
| <b>Neuroworsening</b>         |                                 |                                   | 0.7246         |
| No                            | 1 (33.3)                        | 1 (20)                            |                |
| Yes                           | 2 (66.6)                        | 4 (80)                            |                |
| <b>Thickness of aSDH (mm)</b> |                                 |                                   | 0.2805         |
| Mean±SD                       | 12.67±7.5                       | 8.1±3.68                          |                |
| Min–Max                       | 5.0–20.0                        | 4.5–12.0                          |                |
| Median (IQR)                  | 13.0 (5.0–20.0)                 | 7.0 (4.75–12.0)                   |                |
| <b>Midline shift (mm)</b>     |                                 |                                   | 0.5008         |
| Mean±SD                       | 8.33±7.64                       | 5.6±3.4                           |                |
| Min–Max                       | 0.0–15.0                        | 0.0–9.0                           |                |

| Median (IQR)                                                                                                                                                                                                                                                                                                           | 10.0 (0.0–15.0) | 7.0 (2.5–8.0) |
|------------------------------------------------------------------------------------------------------------------------------------------------------------------------------------------------------------------------------------------------------------------------------------------------------------------------|-----------------|---------------|
| <hr/> mRS=Modified Ranking Scale, H&H=Hunt and Hess Classification<br>ACA=Anterior Cerebral Artery, AcomA=Anterior Communicans Artery, MCA=Middle Cerebral Artery, BAS=Basilar Artery, PICA=Posterior Inferior Cerebellar Artery, ICA=Internal Carotic Artery<br>DCI=Delayed Clinical Ischemia, GCS=Glasgow Coma Scale |                 |               |
