# Supplementary figures and images for: Brain Plasticity Modulator p75 Neurotrophin Receptor in Human Urine after Different Acute Brain Injuries—A Prospective Cohort Study
Source: MDPI journal article supplement (doi:10.3390/biomedicines12010112), 2024-01-05

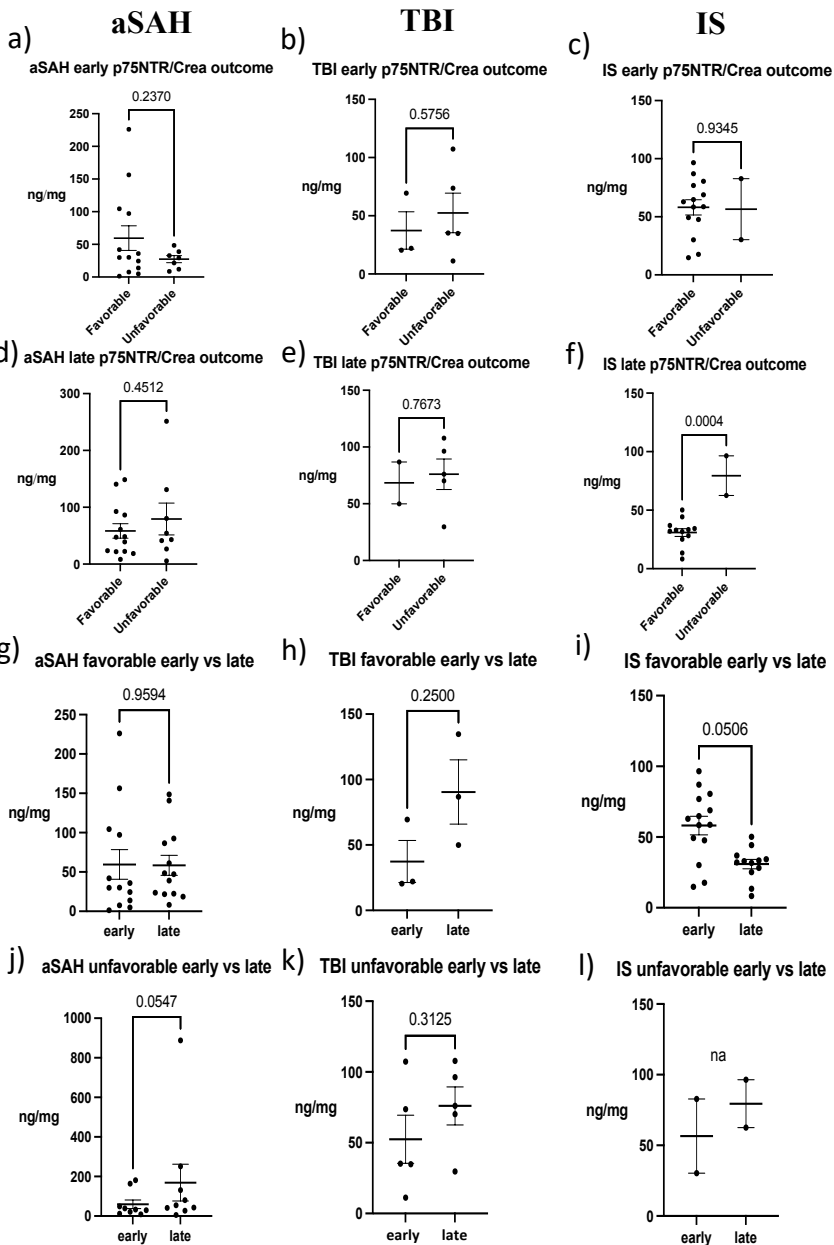

Supplement: s1 [file s1]
